# Supplementary material for: Comparison between Intravoxel Incoherent Motion and Splenic Volumetry to Predict Hepatic Fibrosis Staging in Preoperative Patients
Source: MDPI journal article supplement (doi:10.3390/diagnostics13203200), 2023-10-13
Supplement: s1 [file s1]

**Table S1. Comparison between the original data and our previously published paper [11].**

|                     |                   | Mean<br>(Median) | Minimum | Maximum | 25 percentile | 75 percentile |
|---------------------|-------------------|------------------|---------|---------|---------------|---------------|
| <b>Patient data</b> |                   |                  |         |         |               |               |
| Age                 | [11]              | 66.5 (69.0)      | 24      | 83      | 61            | 74            |
|                     | CS                | 70.4 (72.0)      | 36      | 82      | 67            | 76            |
|                     | <i>P</i><br>value | 0.027            |         |         |               |               |
| BMI                 | [11]              | 23.0 (22.3)      | 17.6    | 31.5    | 20.6          | 25.2          |
|                     | CS                | 23.6 (22.8)      | 17.5    | 33      | 20.9          | 26.1          |
|                     | <i>P</i><br>value | 0.356            |         |         |               |               |
| BSA                 | [11]              | 1.642 (1.637)    | 1.311   | 2.041   | 1.531         | 1.759         |
|                     | CS                | 1.659 (1.626)    | 1.321   | 2.294   | 1.539         | 1.777         |
|                     | <i>P</i><br>value | 0.863            |         |         |               |               |
| Hct                 | [11]              | 40.8 (40.9)      | 33.3    | 49.7    | 38.2          | 43.4          |
|                     | CS                | 39.7 (39.9)      | 29.5    | 50.7    | 36.8          | 42.7          |
|                     | <i>P</i><br>value | 0.178            |         |         |               |               |
| AST                 | [11]              | 35.4 (28.0)      | 15      | 153     | 22            | 38            |
|                     | CS                | 35.4 (28.0)      | 12      | 153     | 21            | 42            |
|                     | <i>P</i><br>value | 0.853            |         |         |               |               |
| ALT                 | [11]              | 32.8 (28.5)      | 8       | 197     | 16.5          | 38.5          |
|                     | CS                | 31.7 (21.0)      | 7       | 123     | 15            | 39            |
|                     | <i>P</i><br>value | 0.603            |         |         |               |               |
| Plt                 | [11]              | 18.8 (18.2)      | 6       | 47.8    | 13.6          | 22.9          |
|                     | CS                | 16.0 (15.3)      | 4.3     | 31.7    | 11.6          | 20.1          |
|                     | <i>P</i><br>value | 0.024            |         |         |               |               |
| INR                 | [11]              | 1.03 (1.01)      | 0.87    | 1.26    | 0.98          | 1.08          |

|         |          |                    |      |      |      |      |
|---------|----------|--------------------|------|------|------|------|
| T bil   | CS       | 1.01 (1.01)        | 0.91 | 1.29 | 0.97 | 1.04 |
|         | <i>P</i> | 0.167              |      |      |      |      |
|         | value    |                    |      |      |      |      |
|         | [11]     | 0.72 (0.64)        | 0.18 | 1.84 | 0.5  | 0.88 |
|         | CS       | 0.69 (0.64)        | 0.31 | 2.43 | 0.49 | 0.84 |
|         | <i>P</i> | 0.703              |      |      |      |      |
| Alb     | value    |                    |      |      |      |      |
|         | [11]     | 4.4 (4.5)          | 3.5  | 5.3  | 4.1  | 4.8  |
|         | CS       | 4.2 (4.2)          | 3.3  | 5.2  | 4    | 4.4  |
|         | <i>P</i> | 0.001              |      |      |      |      |
|         | value    |                    |      |      |      |      |
| Cr      | [11]     | 0.76 (0.74)        | 0.35 | 1.22 | 0.65 | 0.87 |
|         | CS       | 0.86 (0.79)        | 0.45 | 1.57 | 0.65 | 0.99 |
|         | <i>P</i> | 0.105              |      |      |      |      |
|         | value    |                    |      |      |      |      |
|         | [11]     | 11.703<br>(11.000) | 0    | 71.1 | 5.7  | 14   |
|         | CS       | 13.624<br>(11.360) | 3.5  | 77.7 | 7.7  | 16   |
| ING_R15 | <i>P</i> | 0.116              |      |      |      |      |
|         | value    |                    |      |      |      |      |
|         | [11]     | -3.1 (-3.1)        | -3.8 | -2.3 | -3.3 | -2.9 |
| ALBI    | CS       | -2.9 (-2.8)        | -3.7 | -2.1 | -3.1 | -2.7 |
|         | <i>P</i> | <0.001             |      |      |      |      |
|         | value    |                    |      |      |      |      |
| MELD    | [11]     | 2.3 (2.4)          | -5   | 7.7  | 0.2  | 4.6  |
|         | CS       | 3.0 (2.5)          | -4   | 10.4 | 0.7  | 5.3  |
|         | <i>P</i> | 0.288              |      |      |      |      |
|         | value    |                    |      |      |      |      |
|         | [11]     | 0.7 (0.5)          | 0.2  | 3    | 0.3  | 0.9  |
|         | CS       | 0.4 (0.4)          | 0.2  | 1.1  | 0.3  | 0.5  |
| APRI    | <i>P</i> | <0.001             |      |      |      |      |
|         | value    |                    |      |      |      |      |
|         | [11]     | 2.8 (2.2)          | 0.4  | 8.9  | 1.5  | 1.2  |
| FIB_4   |          |                    |      |      |      |      |

|                            |                   |                    |       |        |       |        |
|----------------------------|-------------------|--------------------|-------|--------|-------|--------|
|                            | CS                | 2.1 (2.1)          | 0.4   | 6.8    | 1.2   | 2.8    |
|                            | <i>P</i><br>value | 0.019              |       |        |       |        |
| SV                         | [11]              | 172.90<br>(143.97) | 30.72 | 900.76 | 96.51 | 184.02 |
|                            | CS                | 195.98<br>(171.65) | 58    | 651.95 | 110   | 221    |
|                            | <i>P</i><br>value | 0.089              |       |        |       |        |
| SV/BSA                     | [11]              | 103.63<br>(86.37)  | 23.44 | 519.28 | 60.61 | 106.44 |
|                            | CS                | 117.73<br>(100.04) | 42.82 | 375.62 | 66.82 | 133.64 |
|                            | <i>P</i><br>value | 0.079              |       |        |       |        |
|                            |                   |                    | Male  | Female | (+)   | (-)    |
| Sex                        | [11]              |                    | 53    | 27     |       |        |
|                            | CS                |                    | 49    | 18     |       |        |
|                            | <i>P</i><br>value | 0.473              |       |        |       |        |
| HBV                        | [11]              |                    |       |        | 22    | 58     |
|                            | CS                |                    |       |        | 15    | 52     |
|                            | <i>P</i><br>value | 0.568              |       |        |       |        |
| HCV                        | [11]              |                    |       |        | 23    | 57     |
|                            | CS                |                    |       |        | 17    | 50     |
|                            | <i>P</i><br>value | 0.712              |       |        |       |        |
| Alcoholic liver<br>disease | [11]              |                    |       |        | 8     | 72     |
|                            | CS                |                    |       |        | 9     | 58     |
|                            | <i>P</i><br>value | 0.608              |       |        |       |        |
| Others                     | [11]              |                    |       |        | 3     | 77     |
|                            | CS                |                    |       |        | 4     | 63     |

|                     |                   |       |         |         |
|---------------------|-------------------|-------|---------|---------|
|                     | <i>P</i><br>value | 0.702 |         |         |
|                     |                   |       | 5 point | 6 point |
|                     |                   |       |         | 7 point |
| Child Pugh<br>score | [11]              | 78    | 2       | 0       |
|                     | CS                | 62    | 4       | 1       |
|                     | <i>P</i><br>value | 0.306 |         |         |

Notes: [11], previous study (n=80); CS, current study (n=67); BMI, body mass index; BSA, body surface area; Hct, hematocrit; AST, Aspartate transaminase; ALT, alanine aminotransferase; Plt, platelet; INR, International Normalized Ratio; T bil, Total bilirubin; Alb, Albumin; Cr, Creatinine; ICG\_R15, Indocyanine green retention 15min; ALBI, albumin-bilirubin; MELD, Mayo End-Stage Liver Disease; APRI, aspartate aminotransferase to platelet ratio index; SV, splenic volume; SV/BSA, ratio of splenic volume to body surface area; HBV, Hepatitis B Virus; HCV, Hepatitis C Virus.
